# Supplementary material
Source: PubMed Central journal article supplement (PMC4509623)
Supplement: NIHMS679861-supplement-Supplemental_figs.pdf [file NIHMS679861-supplement-Supplemental_figs.pdf]

# Supplemental Figure 1

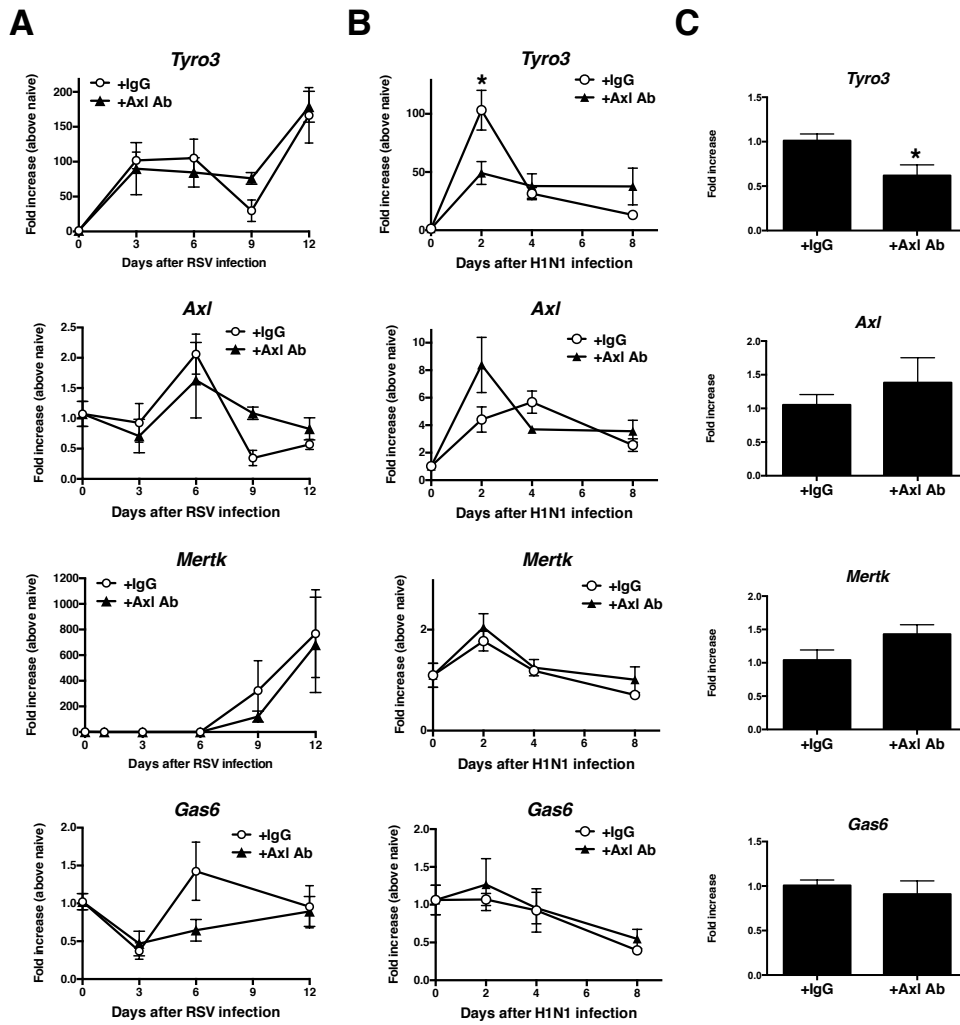

**Supplemental Fig. 1. Anti-Axl mAb treatment did not alter TAM receptor expression.** Quantitative PCR transcript analysis of *Tyro3*, *Axl*, *Mertk*, and *Gas6* in whole lung samples during primary RSV infection (A), primary influenza virus infection (B), and fungal asthma (C) are indicated.

# Supplemental Figure 2

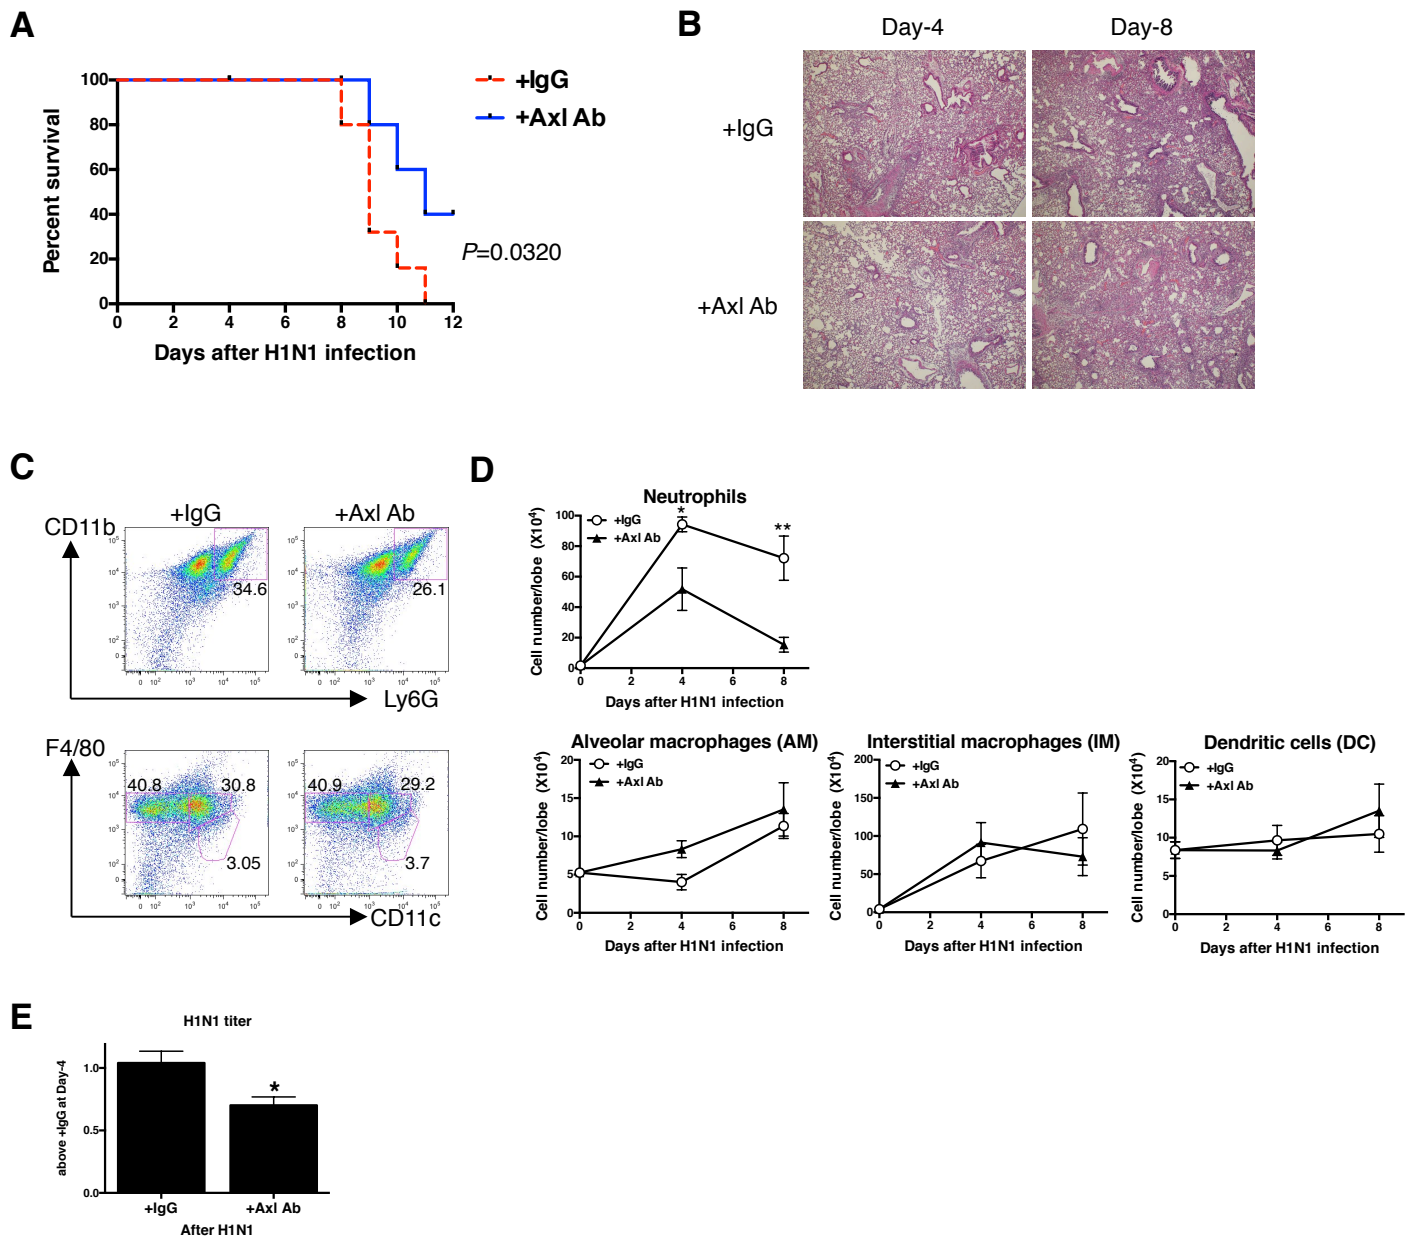

## Supplemental Fig. 2. Anti-Axl mAb treatment after influenza infection significantly inhibited lethality.

Naïve mice were treated with IgG1 or anti-Axl mAb during H1N1 infection at days 2, 4, 8 after intrapulmonary infection with H1N1 influenza virus. Kaplan Meier survival analysis of IgG1-treated group (red) and anti-Axl mAb-treated (blue) mice during H1N1 ( $1 \times 10^4$  PFU) infection (**A**). Results are expressed as the percent survival of a starting cohort of 10 mice per group. Representative hematoxylin and eosin (H&E)-stained lung tissue sections from IgG1- (upper) and anti-Axl mAb-treated (lower) mice at days 2, 4, and 8 post-infection with influenza virus (**B**). Representative flow cytometry analysis of neutrophils (upper panels,  $CD45^+CD11b^{high}Ly6G^{high}$ ), interstitial macrophages (lower panels,  $CD45^+F4/80^+CD11c^-$ ), alveolar macrophages ( $CD45^+F4/80^+CD11c^+$ ), and dendritic cells ( $CD45^+F4/80^-CD11c^+$ ) in IgG1- and anti-Axl mAb-treated lung samples from naïve mice at day 4 after H1N1 inoculation (**C**). Quantification of neutrophils, interstitial and alveolar macrophages, and dendritic cells in IgG1- and anti-Axl mAb-treated lung after H1N1 inoculation (**D**). Lung viral titers in IgG1- and anti-Axl mAb-treated mice at day 4 after H1N1 infection (**E**). \* $P < 0.05$ , \*\* $P < 0.01$ , \*\*\* $P < 0.001$  compared with control IgG-treated group.

# Supplemental Figure 3

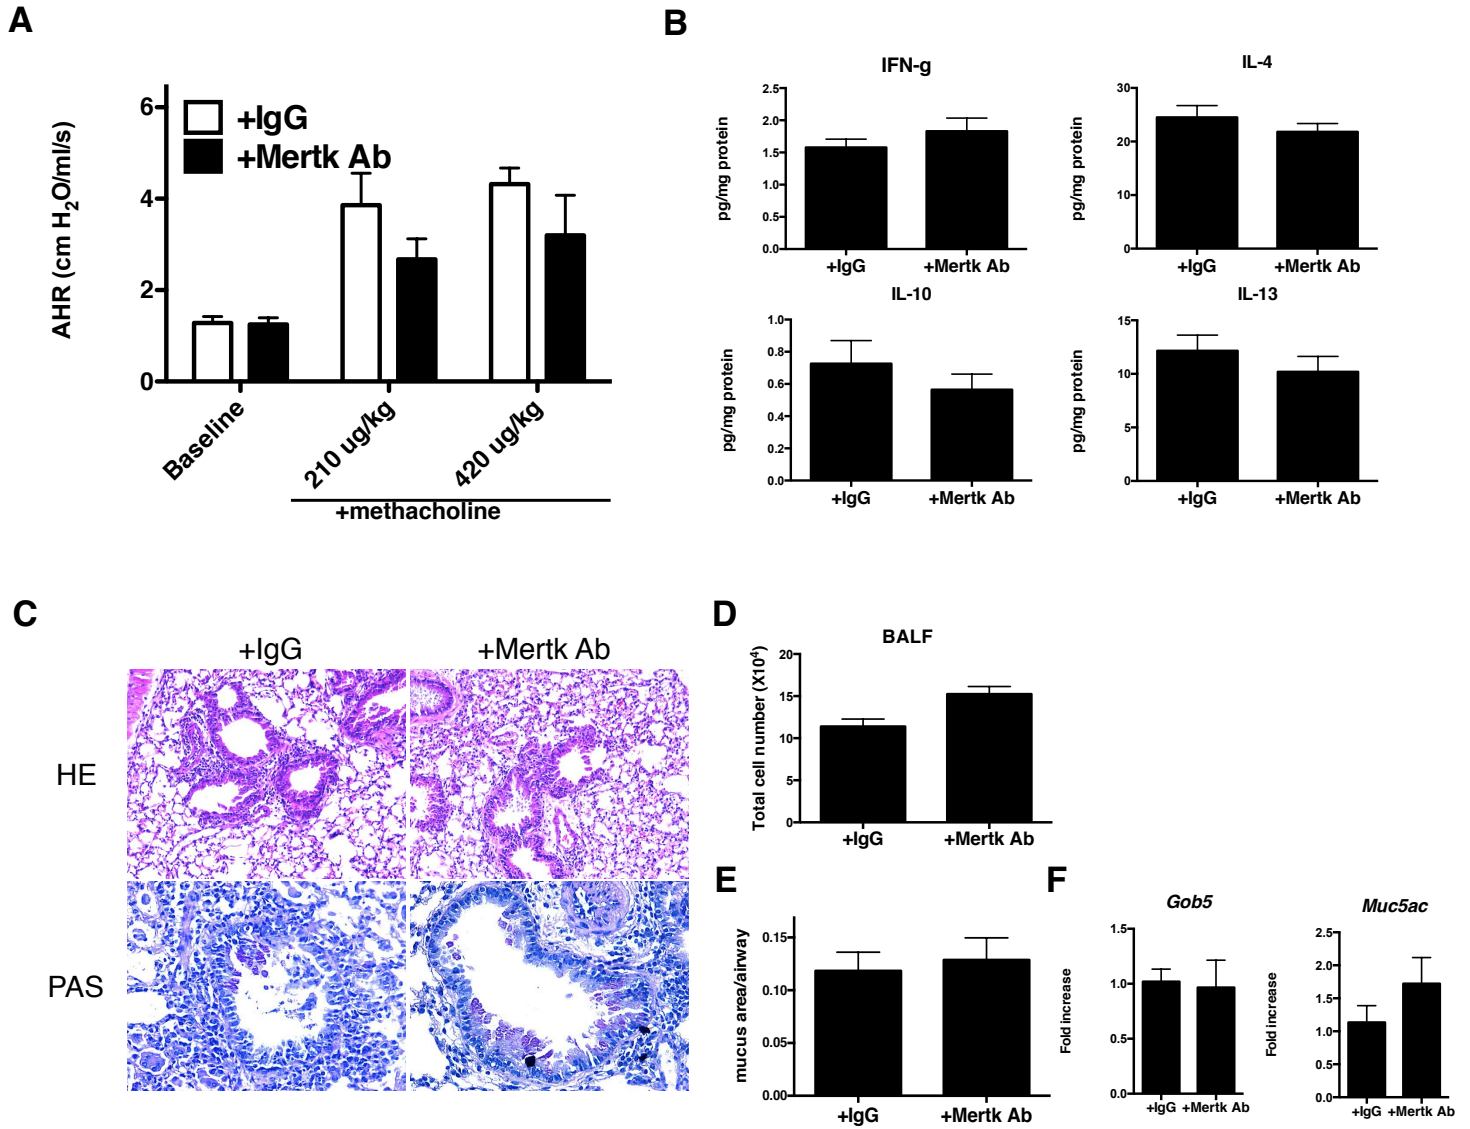

**Supplemental Fig. 3. Anti-Mertk mAb therapy did not inhibit any airway feature in a fungal asthma model.** Airway hyperresponsiveness to a dose of 210  $\mu\text{g}/\text{kg}$  or 420  $\mu\text{g}/\text{kg}$  of methacholine in IgG1-treated (+IgG1) or anti-Mertk mAb-treated (+Mertk mAb; 5  $\mu\text{g}/\text{dose}$  i.p. x 7 doses; **A**) at day 28 after conidia. Whole lung protein levels of IFN-g, IL-4, IL-10, and IL-13 in asthmatic mice treated with IgG1 or anti-Mertk mAb at day 28 after conidia (**B**). Representative H&E- and PAS-stained lung tissue sections from both treatment groups at day 28 after conidia (**C**). Quantification of cells present in BALF from IgG1- and anti-Mertk mAb-treated asthmatic mice (**D**). Quantitative analysis of mucus area in airway from IgG1- and anti-Mertk Ab-treated groups at day 28 after conidia (**E**). Quantitative PCR analysis of *Muc5ac* and *Gob5* in the IgG1 and anti-Mertk mAb groups at day 28 after conidia (**F**). Results are expressed as the mean  $\pm$  SEM for  $n=5/\text{group}$ .

# Supplemental Figure 4

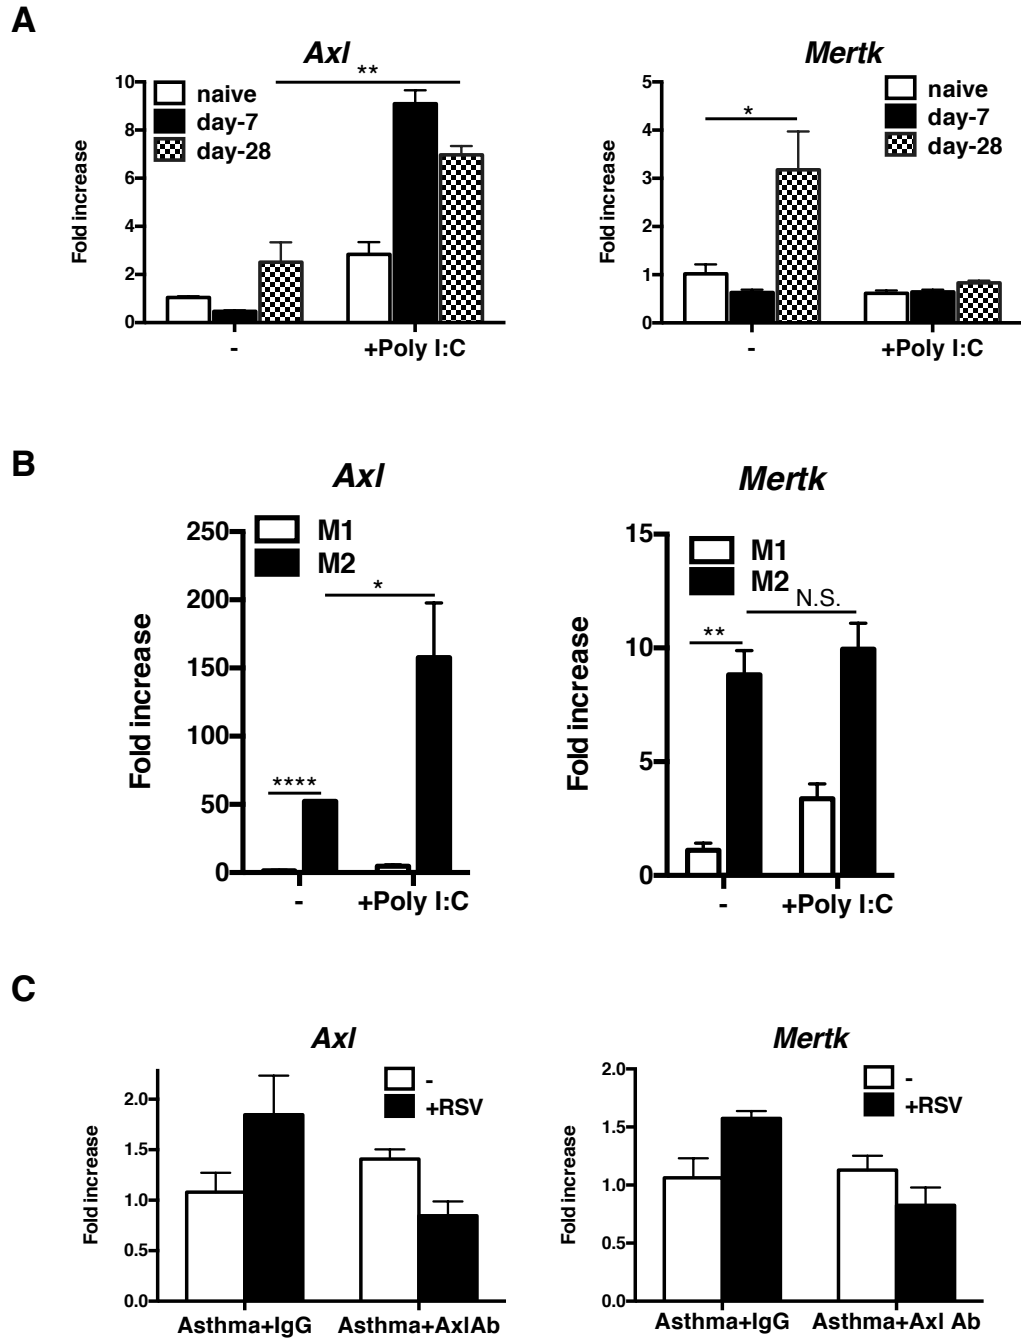

**Supplemental Fig. 4. Synthetic double stranded RNA (Poly I:C) significantly enhanced *Axl* expression in macrophages from asthmatic mice.** Bone marrow-derived macrophages (BMDM) from naïve mice and asthmatic mice prior to and at 7 and 28 days after conidia challenge were exposed to poly I:C (10 µg/ml for 6 h and *Axl* and *Mertk* transcript expression were determined using q-PCR (A). \*,  $P < 0.05$ , \*\*,  $P < 0.01$ . BMDM from naïve mice were stimulated with LPS/IFN-g to induce M1 macrophages (M1) and IL-4/IL-13 to induce M2 macrophages (M2) for 24 h. M1 and M2 macrophages were then exposed to poly I:C for 6 h, and *Axl* and *Mertk* transcript expression were analyzed using q-PCR (B). \*,  $P < 0.05$ , \*\*,  $P < 0.01$  \*\*\*\*,  $P < 0.0001$  versus the naïve group. Quantitative PCR analysis of *Axl* and *Mertk* in IgG1- and anti-*Axl* mAb-treated asthmatic mice at day 42 after conidia with mock (-) or RSV infection (+) (C).
